# Supplementary material for: Hyperosmotic stress induces 2‐cell‐like cells through ROS and ATR signaling
Source: PubMed Central journal article supplement — EMBO Rep. 2023 Jul 11;24(9):e56194. doi: 10.15252/embr.202256194 (PMC10481651; doi:10.15252/embr.202256194), 2023-07-11
Supplement: EMBR-24-e56194-s002.pdf [file EMBR-24-e56194-s002.pdf]

# Expanded View Figures

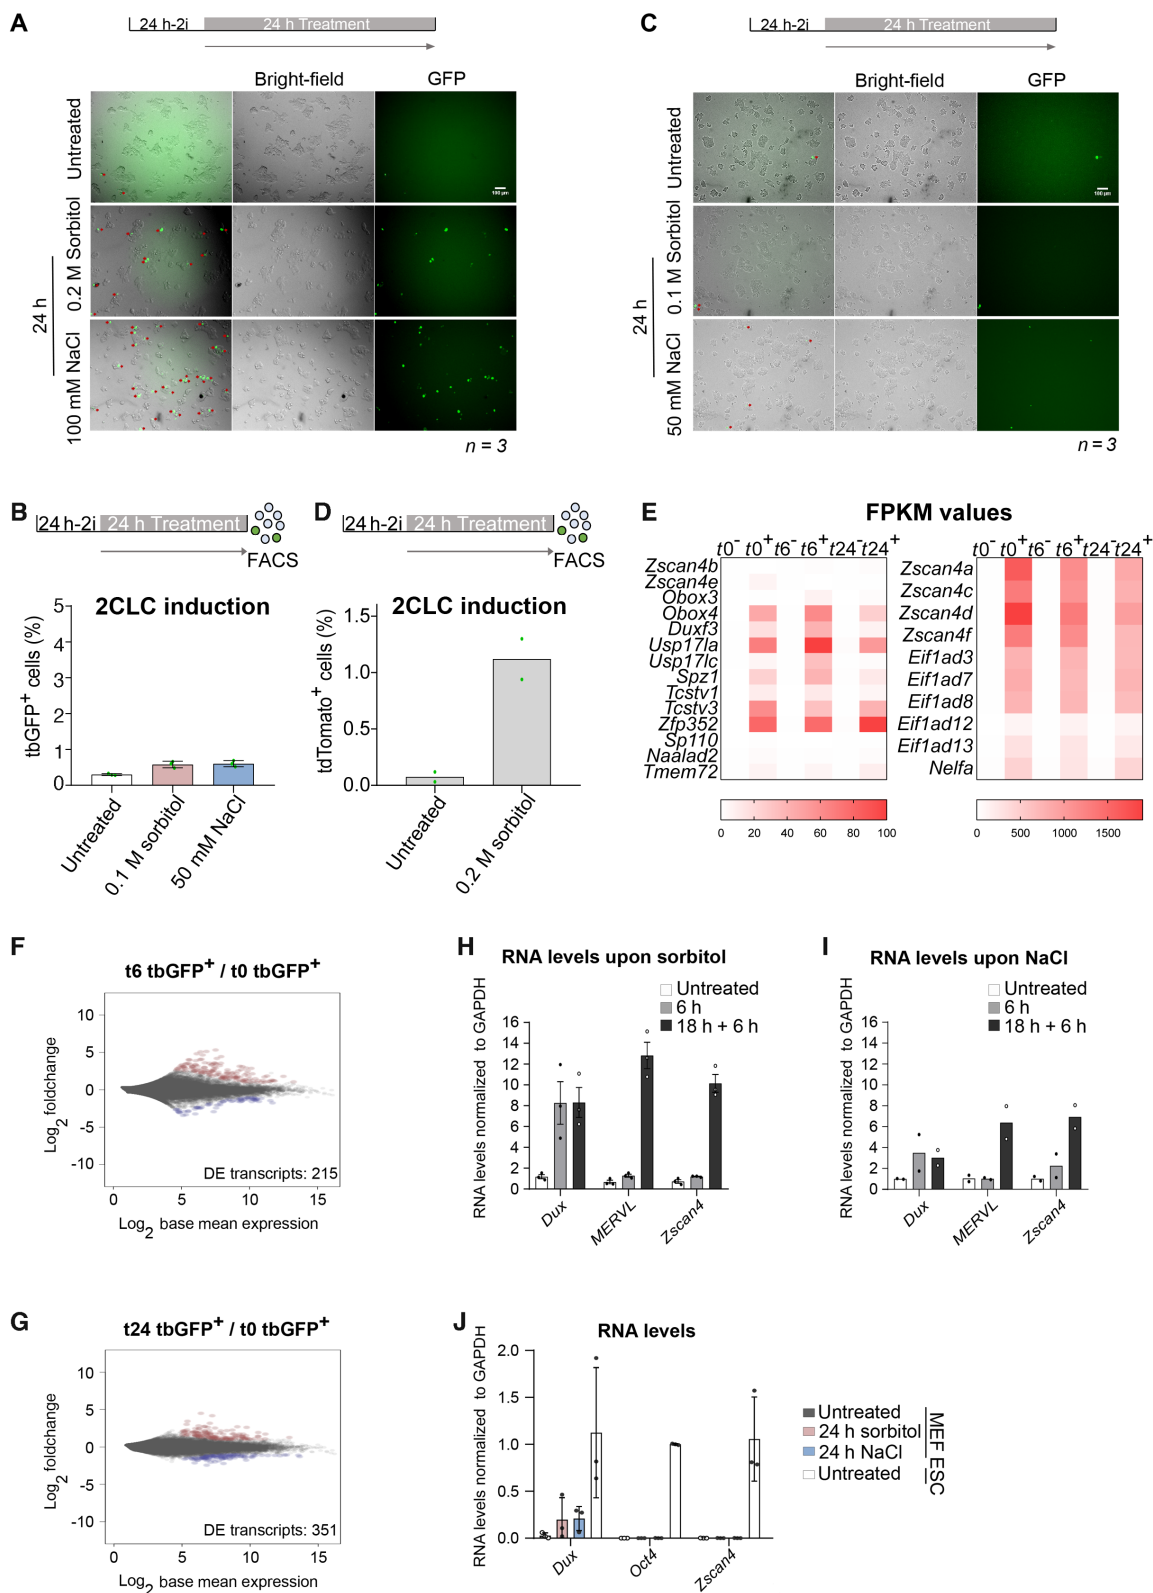

Figure EV1.

**Figure EV1. Hyperosmotic stress induces 2CLCs.**

- A Representative images showing bright-field and GFP fluorescence from ESCs incubated for 24 h with indicated hyperosmotic treatment. Red arrows indicate tbGFP-positive 2CLCs. Scale bar: 100  $\mu$ m.
- B Percentage of 2CLCs obtained by FACS after the indicated sorbitol or NaCl treatments for 24 h. Shown are the mean from two replicates. Individual dots indicate measurement of an independent biological replicate by FACS.
- C Representative image showing bright-field and GFP fluorescence from ESCs incubated for 24 h with the indicated hyperosmotic treatment. Red arrows indicate tbGFP-positive 2CLCs. Scale bar: 100  $\mu$ m.
- D Percentage of 2CLCs obtained by FACS after the indicated 0.2 M sorbitol treatment for 24 h. Shown are the mean from two replicates. Individual dots indicate measurement of an independent biological replicate by FACS.
- E Heatmap depicting FPKM values of the 25 selected 2CLC markers from Fig 1C for all RNA-sequencing conditions. All genes displayed significant differential expression at t0, t6 and t24 sorbitol treatment in tbGFP<sup>+</sup> cells compared to tbGFP<sup>-</sup> cells of related time point ( $P_{\text{adj}} < 0.01$ ).
- F, G MA plots displaying differentially expressed genes in tbGFP<sup>+</sup> from t6 compared to t0 or t24 compared to t0. Significantly DE genes are highlighted in red for up-regulated transcripts and blue for downregulated transcripts ( $P_{\text{adj}} < 0.05$ ;  $\text{Log}_2\text{FoldChange}(\text{tbGFP}^+/\text{tbGFP}^-) > 1$  or  $-1$ ).
- H, I RT-qPCR analysis of the indicated genes in ESC cultures treated with sorbitol or NaCl for the indicated time. Shown are the mean  $\pm$  s.d. of three independent replicates for (G) or the mean of two independent replicates for H. Individual dots indicate fold-change measurement for an independent biological replicate by qPCR.
- J RT-qPCR of the indicated genes in MEF control (untreated) and treated with sorbitol or NaCl for 24 h and compared with untreated ESCs. *Oct4* is shown as comparison of a gene strongly and specifically expressed in ESCs. Shown are the mean  $\pm$  s.d. of three independent replicates.

Source data are available online for this figure.

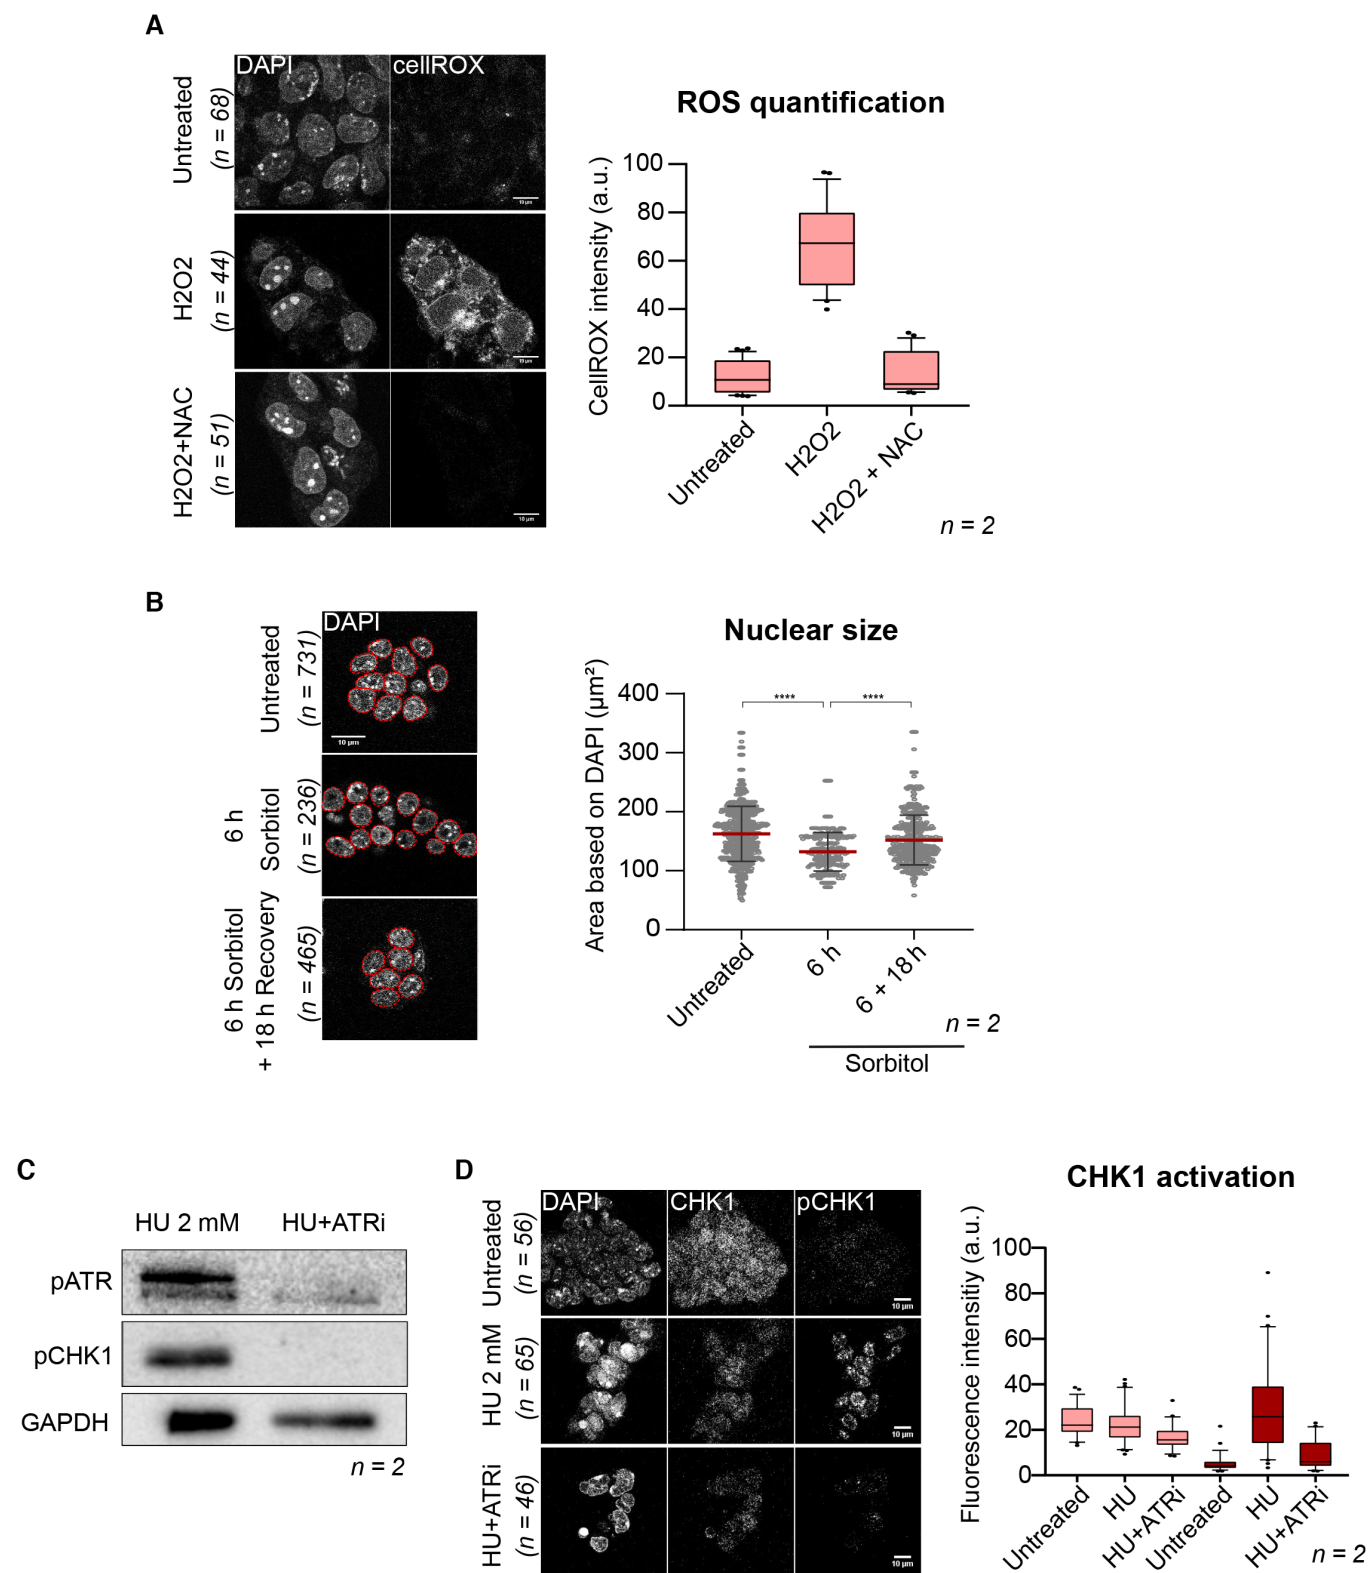

Figure EV2.

**Figure EV2. Hyperosmotic-mediated 2CLC induction is mediated through ROS generation and ATR activation.**

- A (Left) Representative single confocal z-sections of CellROX-DeepRed fluorescence of ESCs treated with either hydrogen-peroxide (H<sub>2</sub>O<sub>2</sub>) with or without addition of the NAC ROS scavenger from two biological replicates. Scale bar: 10 μm. (Right) Boxplots showing quantification of CellROX-DeepRed fluorescence intensity from single z-sections. Boxes indicate the range between the first and third quartile, the line indicates the median and the whiskers display the spread from 5 to 95% of the data. Two-tailed Mann–Whitney tests were performed. A total of 68, 44, and 51 nuclei were quantified in untreated, H<sub>2</sub>O<sub>2</sub>, H<sub>2</sub>O<sub>2</sub> + NAC, respectively.
- B (Left) DAPI signal of representative single-section of ESCs treated with 0.2 M sorbitol for the indicated time from two biological replicates. Nuclei segmentation is shown in red. Scale bar: 10 μm. (Right) The plot displays median (red line) area ± s.d. of nuclear area as determined by DAPI fluorescence. Each dot represents a single nucleus from 2 biological replicates. Two-tail Mann–Whitney tests were performed. A total of 731, 236, and 465 nuclei were quantified in untreated, 6 h, 6 + 18 h sorbitol, respectively.
- C Western blot analysis for the indicated antibodies in ESCs treated with hydroxy-urea (HU) with or without the ATR inhibitor. Shown is one representative image from two independent replicates. p, phosphorylated.
- D (Left) Representative single confocal z-section of immunofluorescence for CHK1 and phosphoCHK1 (pCHK1) of ESCs treated with HU with or without ATR inhibitor from two biological replicates. Scale bar: 10 μm. (Right) Quantification of immunofluorescence intensities from single z-sections. A total of 56, 65, and 46 nuclei were quantified in untreated, 2 mM HU, 2 mM HU + ATRi, respectively. Boxes indicate the range between the first and third quartile, the line indicates the median and the whiskers display the spread from 5 to 95% of the data.

Data information: Stars indicate significant differences obtained using indicated statistical tests with \**P* < 0.05; \*\**P* < 0.01; \*\*\**P* < 0.001; \*\*\*\**P* < 0.0001.

Source data are available online for this figure.
